# Supplementary material for: Improvement of DERA activity and stability in the synthesis of statin precursors by immobilization on magnetic nanoparticles
Source: Royal Society of Chemistry journal article supplement (doi:10.1039/d3re00388d), 2023-09-05
Supplement: d3re00388d1.pdf [file d3re00388d1.pdf]

## Improvement of DERA activity and stability in the synthesis of statin precursors by immobilization on magnetic nanoparticles

Dino Skendrović,<sup>a</sup> Anera Švarc,<sup>b</sup> Tonči Rezić,<sup>c</sup> Andrey Chernev,<sup>d</sup> Aleksandra Rađenović<sup>d</sup> and Ana Vrsalović Presečki\*

### Supplementary material

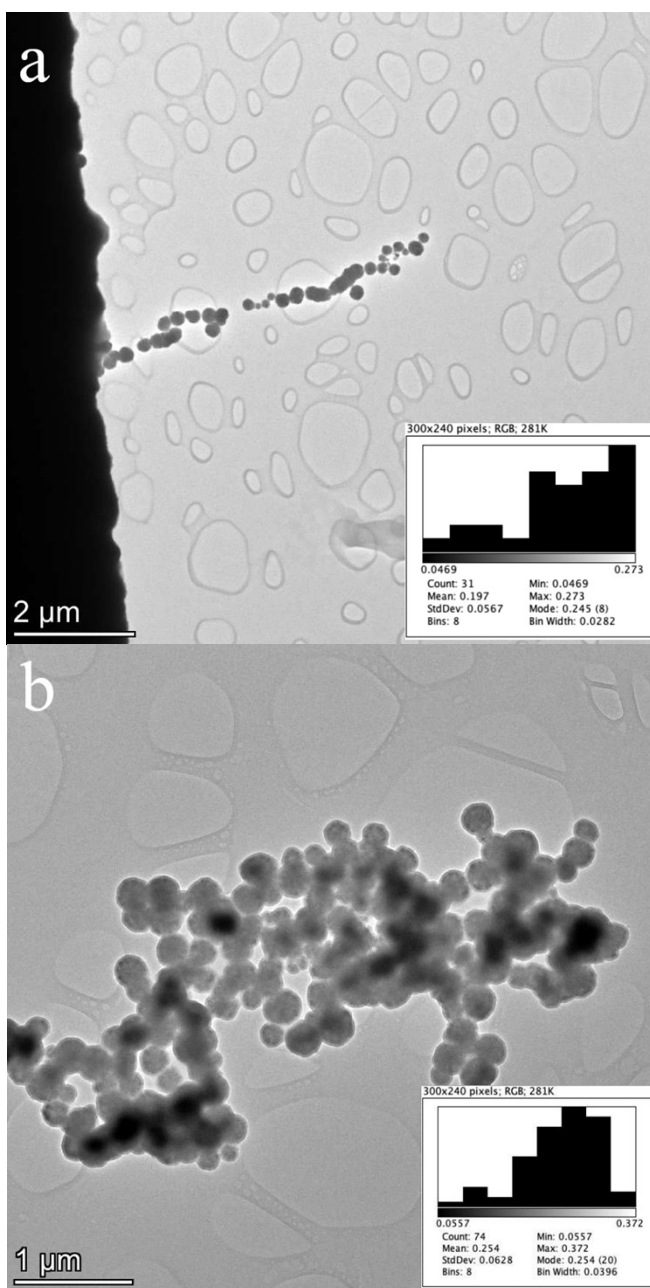

S-1. TEM particle size distributions for a) Fe<sub>3</sub>O<sub>4</sub> and b) Fe<sub>3</sub>O<sub>4</sub>@SiO<sub>2</sub>.

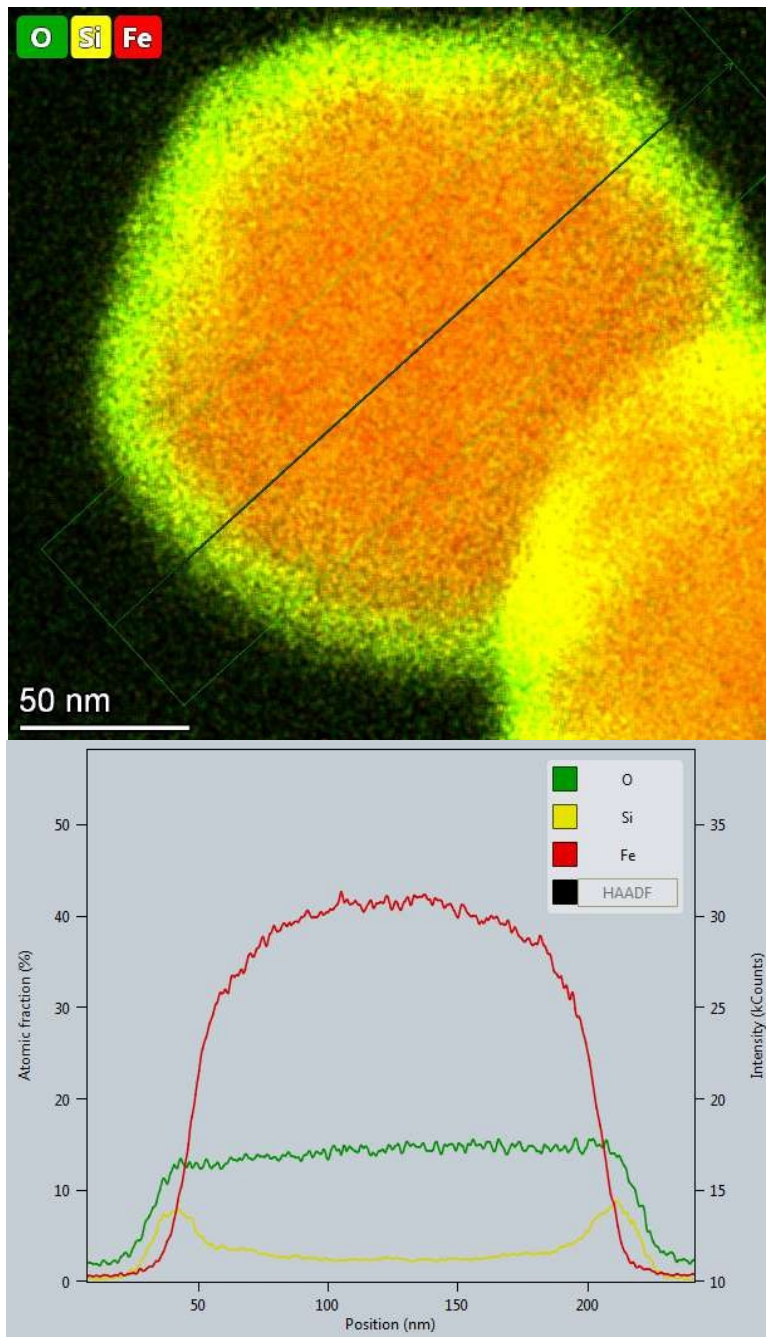

**S-2.** STEM EDX spectroscopy mappings of Fe<sub>3</sub>O<sub>4</sub>@SiO<sub>2</sub> nanoparticles (top) and the material distribution profile across the nanoparticle (bottom).

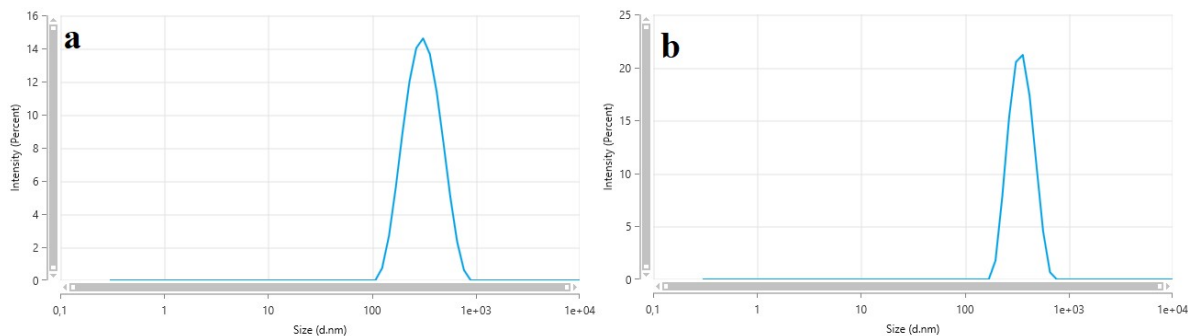

S-3. DLS size distribution of Fe<sub>3</sub>O<sub>4</sub> (a) and Fe<sub>3</sub>O<sub>4</sub>@SiO<sub>2</sub> (b).

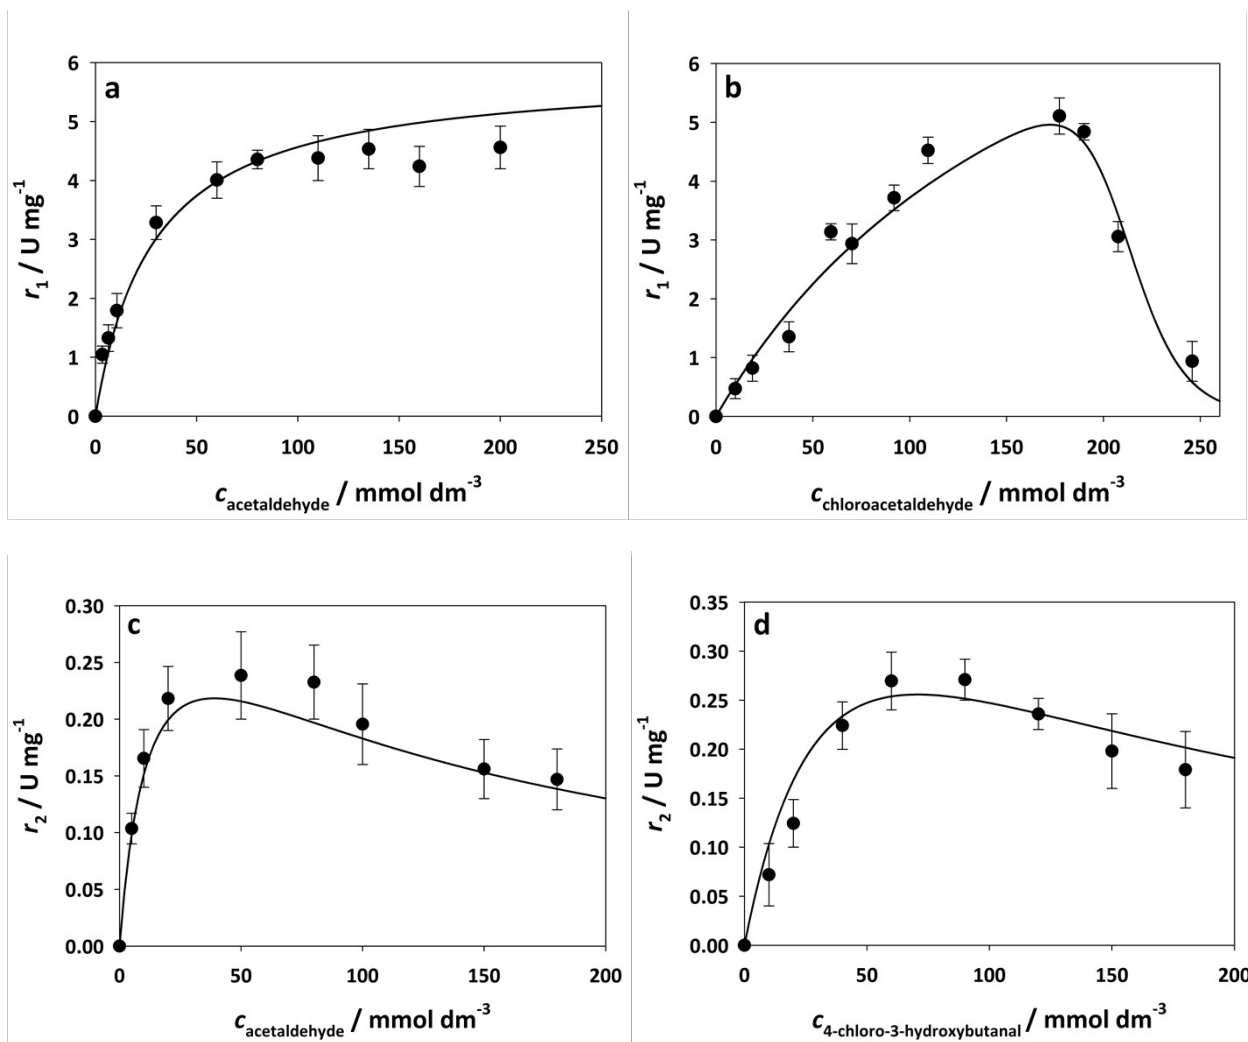

S-4. Kinetics of DERA immobilized on MNP/APTES/15 mM succinic anhydride in the reaction of first (a, b) and second (c, d) aldol addition. The influence of: A -acetaldehyde ( $c_{\text{chloroacetaldehyde}} = 140 \text{ mM}$ ), B - chloroacetaldehyde ( $c_{\text{acetaldehyde}} = 100 \text{ mM}$ ), C - acetaldehyde ( $c_{\text{4-chloro-3-hydroxybutanal}} = 40 \text{ mM}$ ) and D - 4-chloro-3-hydroxybutanal ( $c_{\text{acetaldehyde}} = 50 \text{ mM}$ ) concentration on the initial reaction rate (0.1 M phosphate buffer pH 6, 25 °C,  $\gamma_{\text{DERA}} = 1 \text{ mg cm}^{-3}$ ).

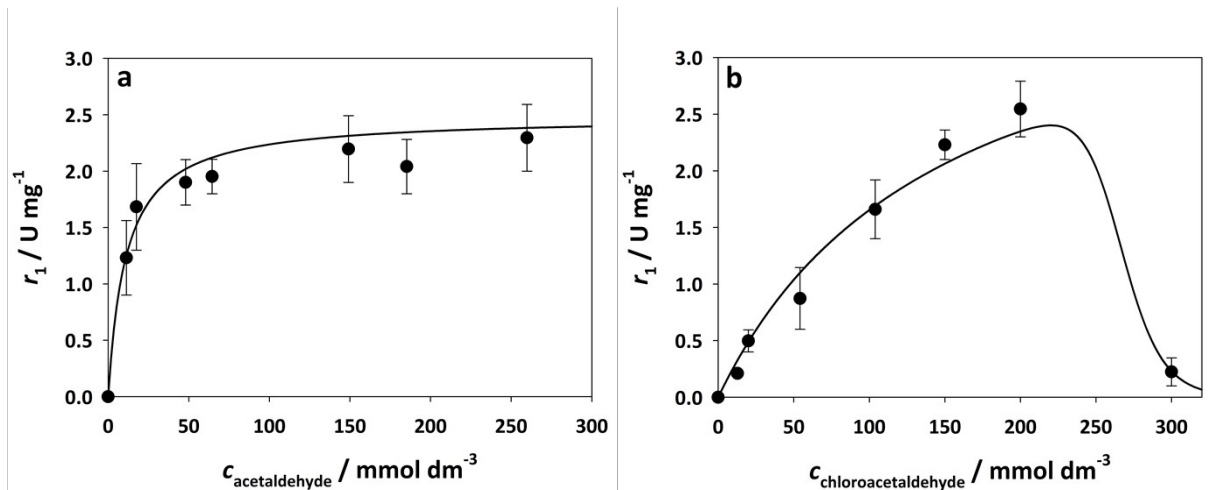

S-5. Kinetics of free DERA in the reaction of first aldol addition. The influence of: a - acetaldehyde ( $c_{\text{chloroacetaldehyde}} = 100 \text{ mM}$ ) and b - chloroacetaldehyde ( $c_{\text{acetaldehyde}} = 200 \text{ mM}$ ) concentration on the initial reaction rate (0.1 M phosphate buffer pH 6, 25 °C,  $\gamma_{\text{DERA}} = 1 \text{ mg cm}^{-3}$ ).
